# Supplementary material
Source: bioRxiv or medRxiv preprint supplement (https://www.biorxiv.org/highwire/filestream/120870/field_highwire_adjunct_files/6/397992-7.pdf)
Supplement: Supplementary file [file 397992-7.pdf]

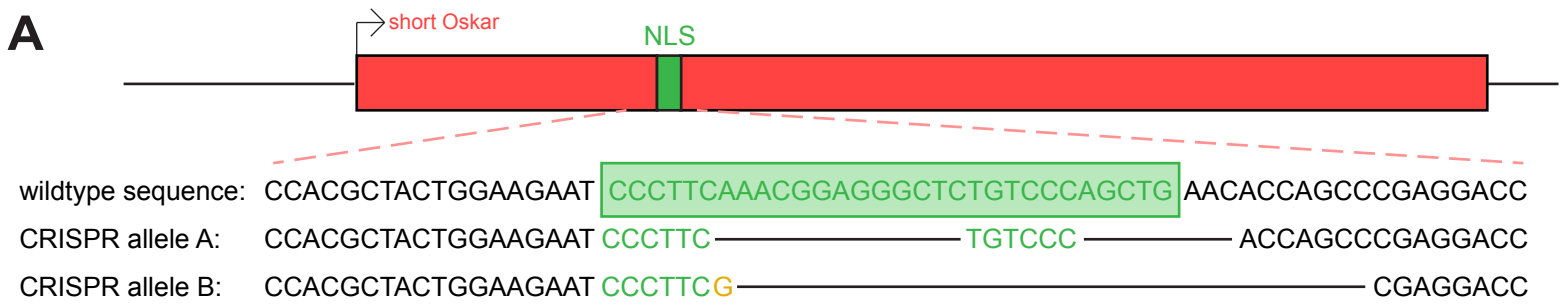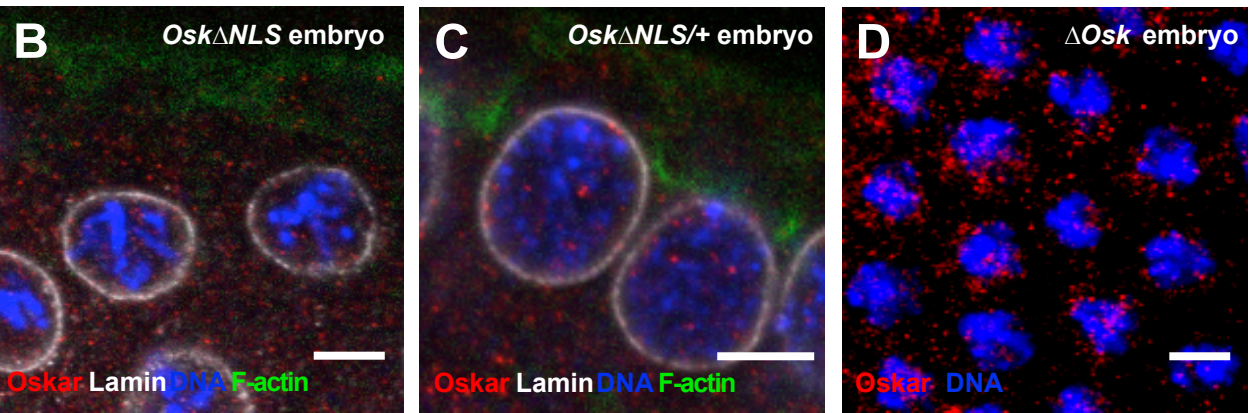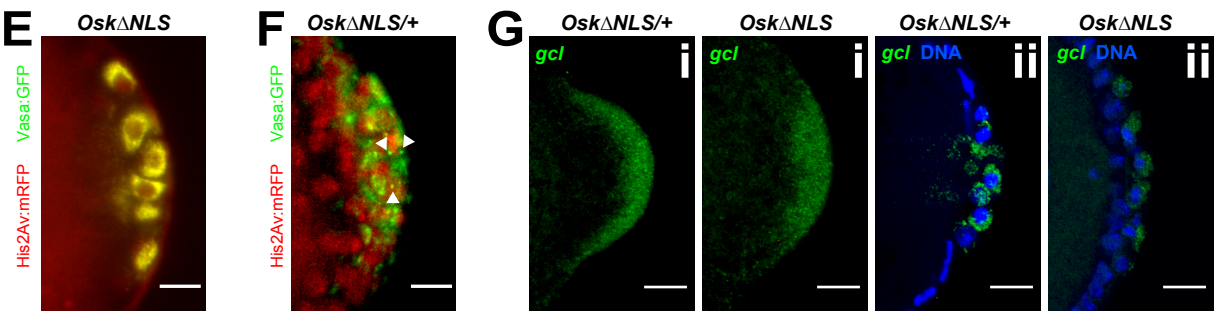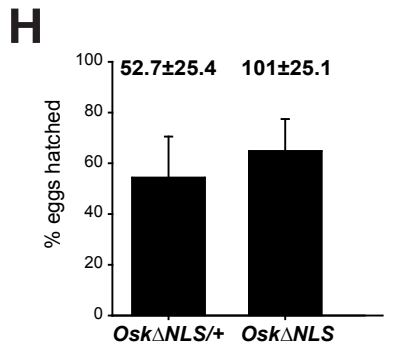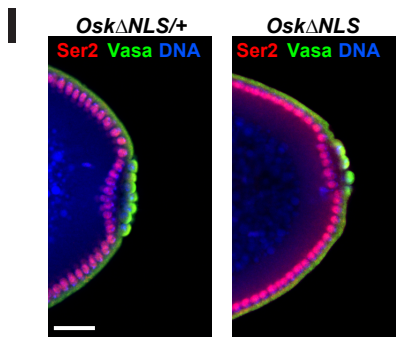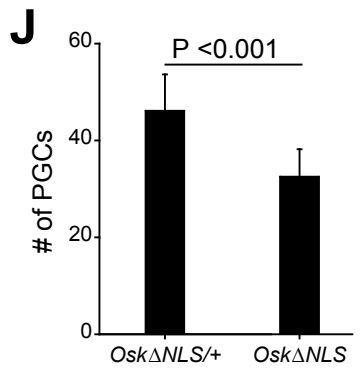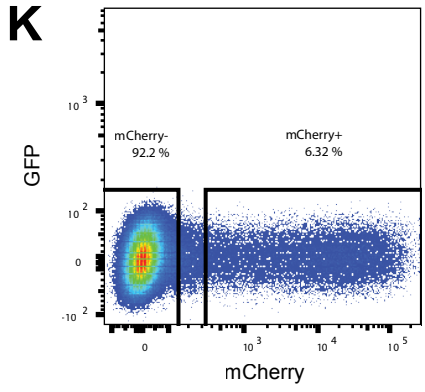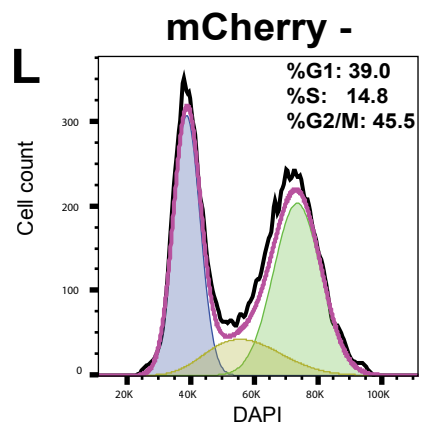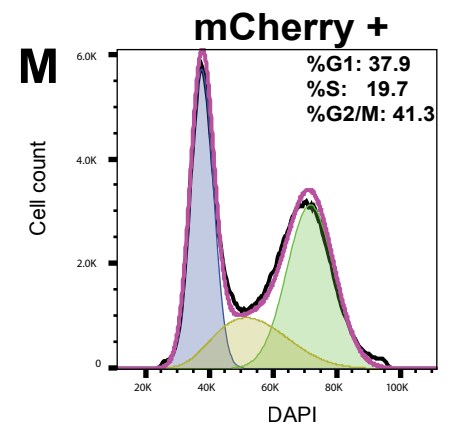

**Figure S7**
